# Supplementary material for: Design of an electrochemical platform for the determination of diclofenac sodium utilizing a graphenized pencil graphite electrode modified with a Cu–Al layered double hydroxide/chicken feet yellow membrane
Source: Royal Society of Chemistry journal article supplement (doi:10.1039/d1nj02258j), 2021-01-01
Supplement: d1nj02258j1.pdf [file d1nj02258j1.pdf]

# Design of An electrochemical platform for Determination of Diclofenac Sodium utilizing a Graphenized Pencil Graphite Electrode Modified with Cu-Al Layered Double Hydroxide/ Chicken Feet Yellow Membrane

Younes Bahadori\*, Habib Razmi\*

*Department of Chemistry, Faculty of Basic Sciences, Azarbaijan Shahid Madani University, P.O.*

*Box 53714-161, Tabriz, Iran*

## Table of Contents

**Fig. S1.** Optimization of parameters influencing the preparation of Cu-Al LDH/CFYM/GPGE based on DCF oxidation response ( $[DCF] = 47.6 \mu\text{M}$ : (A) influence of concentration of CFYM, and (B) influence of concentration of Cu-Al LDH dispersion.

**Fig. S2.** DPV current response of (A) reconstruction, (B) repeatability, and (C) storage stability on the Cu-Al LDH/CFYM/GPGE sensor in PBS solution ( $\text{pH} = 7.0$ ) containing  $47.6 \mu\text{M}$  DCF.

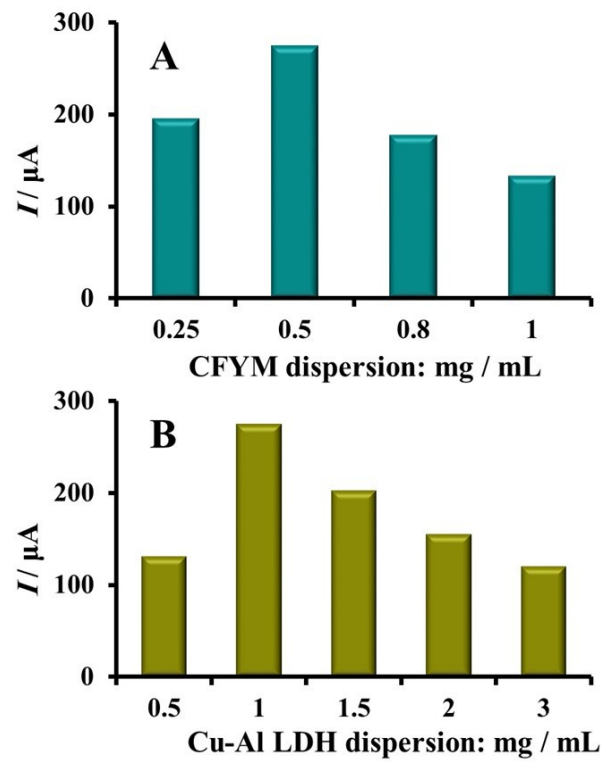

**Fig. S1.** Optimization of parameters influencing the preparation of Cu-Al LDH/CFYM/GPGE based on DCF oxidation response ( $[\text{DCF}] = 47.6 \mu\text{M}$ ): (A) influence of concentration of CFYM, and (B) influence of concentration of Cu-Al LDH dispersion.

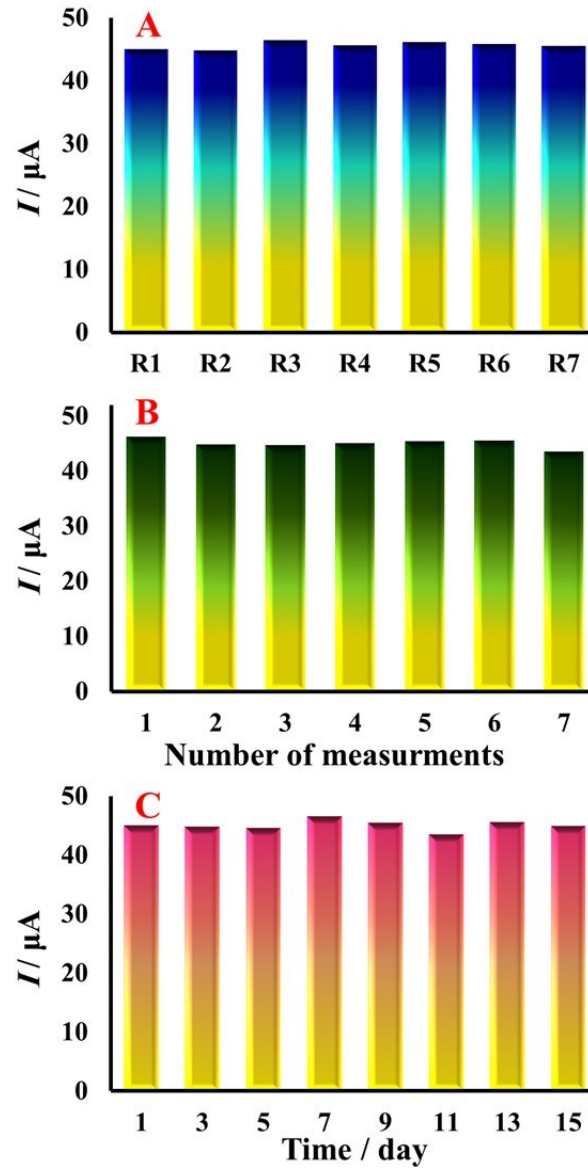

**Fig. S2.** DPV current response of (A) reconstruction, (B) repeatability, and (C) storage stability on the Cu-Al LDH/CFYM/GPGE sensor in PBS solution (pH = 7.0) containing 47.6  $\mu\text{M}$  DCF.
